# Supplementary material for: Drug interactions in hospital prescriptions in Denmark: Prevalence and associations with adverse outcomes
Source: PubMed Central journal article supplement — Pharmacoepidemiol Drug Saf. 2022 Feb 22;31(6):632–42. doi: 10.1002/pds.5415 (PMC9303679; doi:10.1002/pds.5415), 2022-02-22

# Online supplementary content

Drug interactions in hospital prescriptions in Denmark: Prevalence and associations with adverse outcome

Cristina Leal Rodríguez, Benjamin Skov Kaas-Hansen, Robert Eriksson, Jorge Hernansanz Biel, Kirstine G. Belling, Stig Ejdrup Andersen, Søren Brunak

|                                                                                                                                                    |    |
|----------------------------------------------------------------------------------------------------------------------------------------------------|----|
| <b>Table S1.</b> Prevalence of potential drug-drug interactions based on recommendation and documentation level. ....                              | 2  |
| <b>Table S2.</b> Drugs involved in discouraged drug pairs. ....                                                                                    | 3  |
| <b>Table S3.</b> Overview of drugs involved in discouraged combinations.....                                                                       | 10 |
| <b>Table S4.</b> List of discouraged drug pairs .....                                                                                              | 17 |
| <b>Table S5.</b> Effect-size estimates of exposure to discouraged drug pairs on post-discharge mortality, readmission and length-of-stay .....     | 19 |
| <b>Figure S1.</b> Concomitant drug exposure.....                                                                                                   | 23 |
| <b>Figure S2.</b> Pipeline workflow .....                                                                                                          | 24 |
| <b>Figure S3.</b> Attrition diagram.....                                                                                                           | 24 |
| <b>Figure S4.</b> Drugs prevalently involved in discouraged drug pairs .....                                                                       | 25 |
| <b>Figure S5.</b> Standardised differences in proportions of diagnoses in admissions with and without discouraged drug pairs by patient type ..... | 26 |
| <b>Figure S6.</b> Phenotyping of diagnoses and medications .....                                                                                   | 27 |
| <b>Figure S7.</b> Phenotyping of diagnoses and medications by patient type.....                                                                    | 28 |
| <b>Figure S8.</b> Causes of death at ICD-10 chapter level among deceased exposed to selected drug pairs .....                                      | 29 |

**Table S1. Prevalence of potential drug-drug interactions based on recommendation and documentation level.**

Unique drug combinations (upper cells) and prevalence (lower cells) of pDDIs by management recommendation and documentation level. Values are N (%).

| Recommendation level   | Documentation level |              |                    |                   | Total        |
|------------------------|---------------------|--------------|--------------------|-------------------|--------------|
|                        | Well documented     | Documented   | Limited documented | Poorly documented |              |
| 1: Discouraged         | 25 (17)             | 70 (48)      | 23 (16)            | 28 (19)           | 146 (3)      |
|                        | 8,160 (45)          | 5,918 (33)   | 3,477 (19)         | 2,133 (12)        | 18,192 (3)   |
| 2: Dose adjustment     | 173 (17)            | 540 (54)     | 74 (7)             | 218 (22)          | 1,005 (18)   |
|                        | 8,1407 (55)         | 91,096 (61)  | 3,599 (2)          | 23,730 (16)       | 148,455 (23) |
| 3: Staggered ingestion | 105 (46)            | 86 (38)      | 21 (9)             | 14 (6)            | 226 (4)      |
|                        | 81,050 (89)         | 12,129 (13)  | 2,744 (3)          | 488 (1)           | 90,662 (14)  |
| 4: Precautions         | 304 (17)            | 834 (48)     | 161 (9)            | 443 (25)          | 1,742 (31)   |
|                        | 16,3097 (31)        | 468,888 (88) | 85,764 (16)        | 123,792 (23)      | 532,066 (81) |
| 5: No action needed    | 259 (10)            | 1,755 (69)   | 230 (9)            | 283 (11)          | 2,527 (45)   |
|                        | 14,1733 (30)        | 399,115 (85) | 216,539 (46)       | 170,043 (36)      | 470,956 (71) |
| Total                  | 866 (12)            | 3,285 (58)   | 509 (9)            | 986 (17)          | 5,646        |
|                        | 28,8210 (44)        | 604,999 (92) | 246,771 (37)       | 234,205 (36)      | 659,525      |

**Table S2. Drugs involved in discouraged drug pairs.**

Drugs used by less than 5 patients were omitted to avoid privacy issues.

| Drug name      | ATC     | Discouraged-pDDIs (N) | Pairs (N) | Discouraged-pDDIs involving drug (%) | Admissions with discouraged-pDDIs (N) | Admissions with drug (N) | Admissions with discouraged-pDDIs (%) | Patients with discouraged-pDDI (N) | Patients with drug (N) | Patients with discouraged-pDDI (%) | Total admissions (N) | Total patients (N) | Patients overall (%) | Admissions overall (%) |
|----------------|---------|-----------------------|-----------|--------------------------------------|---------------------------------------|--------------------------|---------------------------------------|------------------------------------|------------------------|------------------------------------|----------------------|--------------------|----------------------|------------------------|
| Erythromycin   | J01FA01 | 8                     | 860       | 0.93                                 | 1573                                  | 5665                     | 27.77                                 | 1461                               | 5001                   | 29.21                              | 28862<br>27          | 94547<br>5         | 0.53                 | 0.2                    |
| Rifabutin      | J04AB04 | 2                     | 224       | 0.89                                 | 25                                    | 101                      | 24.75                                 | 10                                 | 46                     | 21.74                              | 28862<br>27          | 94547<br>5         | 0                    | 0                      |
| Ketoconazole   | D01AC08 | 6                     | 753       | 0.8                                  | 644                                   | 3158                     | 20.39                                 | 320                                | 1513                   | 21.15                              | 28862<br>27          | 94547<br>5         | 0.16                 | 0.11                   |
| Diclofenac     | S01BC03 | 1                     | 370       | 0.27                                 | 53                                    | 313                      | 16.93                                 | 13                                 | 177                    | 7.34                               | 28862<br>27          | 94547<br>5         | 0.02                 | 0.01                   |
| Clarithromycin | J01FA09 | 14                    | 1086      | 1.29                                 | 4022                                  | 25792                    | 15.59                                 | 3338                               | 21008                  | 15.89                              | 28862<br>27          | 94547<br>5         | 2.22                 | 0.89                   |
| Paroxetine     | N06AB05 | 4                     | 832       | 0.48                                 | 1206                                  | 8733                     | 13.81                                 | 408                                | 2707                   | 15.07                              | 28862<br>27          | 94547<br>5         | 0.29                 | 0.3                    |
| Domperidone    | A03FA03 | 1                     | 1009      | 0.1                                  | 2872                                  | 23213                    | 12.37                                 | 2028                               | 10571                  | 19.18                              | 28862<br>27          | 94547<br>5         | 1.12                 | 0.8                    |
| Isocarboxazid  | N06AF01 | 4                     | 400       | 1                                    | 90                                    | 789                      | 11.41                                 | 36                                 | 249                    | 14.46                              | 28862<br>27          | 94547<br>5         | 0.03                 | 0.03                   |
| Warfarin       | B01AA03 | 16                    | 1202      | 1.33                                 | 12570                                 | 12165<br>3               | 10.33                                 | 8791                               | 42101                  | 20.88                              | 28862<br>27          | 94547<br>5         | 4.45                 | 4.21                   |
| Diclofenac     | D11AX18 | 1                     | 289       | 0.35                                 | 18                                    | 197                      | 9.14                                  | 6                                  | 87                     | 6.9                                | 28862<br>27          | 94547<br>5         | 0.01                 | 0.01                   |
| Imatinib       | L01XE01 | 1                     | 491       | 0.2                                  | 139                                   | 1543                     | 9.01                                  | 44                                 | 337                    | 13.06                              | 28862<br>27          | 94547<br>5         | 0.04                 | 0.05                   |
| Etoricoxib     | M01AH05 | 1                     | 216       | 0.46                                 | 9                                     | 106                      | 8.49                                  | 6                                  | 51                     | 11.76                              | 28862<br>27          | 94547<br>5         | 0.01                 | 0                      |
| Sirolimus      | L04AA10 | 3                     | 434       | 0.69                                 | 168                                   | 2085                     | 8.06                                  | 30                                 | 233                    | 12.88                              | 28862<br>27          | 94547<br>5         | 0.02                 | 0.07                   |

|                                                                       |         |   |      |      |      |       |      |      |       |       |             |            |      |      |
|-----------------------------------------------------------------------|---------|---|------|------|------|-------|------|------|-------|-------|-------------|------------|------|------|
| <b>Ketoconazole</b>                                                   | J02AB02 | 2 | 248  | 0.81 | 12   | 158   | 7.59 | 9    | 75    | 12    | 28862<br>27 | 94547<br>5 | 0.01 | 0.01 |
| <b>Phenprocoumon</b>                                                  | B01AA04 | 2 | 542  | 0.37 | 146  | 1985  | 7.36 | 97   | 649   | 14.95 | 28862<br>27 | 94547<br>5 | 0.07 | 0.07 |
| <b>Pravastatin</b>                                                    | C10AA03 | 1 | 732  | 0.14 | 371  | 5193  | 7.14 | 114  | 1518  | 7.51  | 28862<br>27 | 94547<br>5 | 0.16 | 0.18 |
| <b>Ciclosporin</b>                                                    | L04AD01 | 5 | 819  | 0.61 | 681  | 9595  | 7.1  | 193  | 2257  | 8.55  | 28862<br>27 | 94547<br>5 | 0.24 | 0.33 |
| <b>Clonidine</b>                                                      | N02CX02 | 3 | 982  | 0.31 | 806  | 11522 | 7    | 303  | 7371  | 4.11  | 28862<br>27 | 94547<br>5 | 0.78 | 0.4  |
| <b>Piroxicam</b>                                                      | M02AA07 | 1 | 401  | 0.25 | 27   | 387   | 6.98 | 13   | 232   | 5.6   | 28862<br>27 | 94547<br>5 | 0.02 | 0.01 |
| <b>Tizanidine</b>                                                     | M03BX02 | 3 | 703  | 0.43 | 321  | 4744  | 6.77 | 194  | 1244  | 15.59 | 28862<br>27 | 94547<br>5 | 0.13 | 0.16 |
| <b>Dronedarone</b>                                                    | C01BD07 | 1 | 307  | 0.33 | 59   | 910   | 6.48 | 32   | 325   | 9.85  | 28862<br>27 | 94547<br>5 | 0.03 | 0.03 |
| <b>Tenoxicam</b>                                                      | M01AC02 | 1 | 271  | 0.37 | 15   | 246   | 6.1  | 5    | 105   | 4.76  | 28862<br>27 | 94547<br>5 | 0.01 | 0.01 |
| <b>Diclofenac</b>                                                     | M02AA15 | 1 | 443  | 0.23 | 24   | 433   | 5.54 | 16   | 253   | 6.32  | 28862<br>27 | 94547<br>5 | 0.03 | 0.02 |
| <b>Voriconazole</b>                                                   | J02AC03 | 3 | 734  | 0.41 | 192  | 3542  | 5.42 | 49   | 1418  | 3.46  | 28862<br>27 | 94547<br>5 | 0.15 | 0.12 |
| <b>Itraconazole</b>                                                   | J02AC02 | 2 | 578  | 0.35 | 53   | 1149  | 4.61 | 38   | 532   | 7.14  | 28862<br>27 | 94547<br>5 | 0.06 | 0.04 |
| <b>Fluconazole</b>                                                    | J02AC01 | 2 | 1318 | 0.15 | 3802 | 88426 | 4.3  | 2929 | 50842 | 5.76  | 28862<br>27 | 94547<br>5 | 5.38 | 3.06 |
| <b>Ibuprofen</b>                                                      | M02AA13 | 1 | 290  | 0.34 | 6    | 148   | 4.05 | 5    | 94    | 5.32  | 28862<br>27 | 94547<br>5 | 0.01 | 0.01 |
| <b>Rifampicin,<br/>Pyrazinamide,<br/>Ethambutol and<br/>Isoniazid</b> | J04AM06 | 4 | 303  | 1.32 | 12   | 328   | 3.66 | 7    | 203   | 3.45  | 28862<br>27 | 94547<br>5 | 0.02 | 0.01 |
| <b>Nabumetone</b>                                                     | M01AX01 | 1 | 493  | 0.2  | 27   | 759   | 3.56 | 18   | 339   | 5.31  | 28862<br>27 | 94547<br>5 | 0.04 | 0.03 |
| <b>Simvastatin<br/>and Ezetimibe</b>                                  | C10BA02 | 2 | 284  | 0.7  | 10   | 293   | 3.41 | 8    | 101   | 7.92  | 28862<br>27 | 94547<br>5 | 0.01 | 0.01 |

|                                                                         |         |   |      |      |     |       |      |     |       |      |             |            |      |      |
|-------------------------------------------------------------------------|---------|---|------|------|-----|-------|------|-----|-------|------|-------------|------------|------|------|
| <b>Terbinafine</b>                                                      | D01BA02 | 5 | 631  | 0.79 | 57  | 1685  | 3.38 | 31  | 912   | 3.4  | 28862<br>27 | 94547<br>5 | 0.1  | 0.06 |
| <b>Carbamazepine</b>                                                    | N03AF01 | 8 | 873  | 0.92 | 337 | 10396 | 3.24 | 178 | 3167  | 5.62 | 28862<br>27 | 94547<br>5 | 0.33 | 0.36 |
| <b>Terbinafine</b>                                                      | D01AE15 | 5 | 848  | 0.59 | 211 | 6839  | 3.09 | 144 | 4481  | 3.21 | 28862<br>27 | 94547<br>5 | 0.47 | 0.24 |
| <b>Diclofenac, combinations</b>                                         | M01AB55 | 1 | 546  | 0.18 | 37  | 1371  | 2.7  | 22  | 598   | 3.68 | 28862<br>27 | 94547<br>5 | 0.06 | 0.05 |
| <b>Etodolac</b>                                                         | M01AB08 | 1 | 847  | 0.12 | 370 | 14021 | 2.64 | 251 | 9338  | 2.69 | 28862<br>27 | 94547<br>5 | 0.99 | 0.49 |
| <b>Azathioprine</b>                                                     | L04AX01 | 1 | 896  | 0.11 | 315 | 12493 | 2.52 | 139 | 3640  | 3.82 | 28862<br>27 | 94547<br>5 | 0.38 | 0.43 |
| <b>Ritonavir</b>                                                        | J05AE03 | 5 | 590  | 0.85 | 76  | 3029  | 2.51 | 47  | 792   | 5.93 | 28862<br>27 | 94547<br>5 | 0.08 | 0.1  |
| <b>Amitriptyline</b>                                                    | N06AA09 | 3 | 1114 | 0.27 | 902 | 36127 | 2.5  | 376 | 12365 | 3.04 | 28862<br>27 | 94547<br>5 | 1.31 | 1.25 |
| <b>Emtricitabine, tenofovir disoproxil, elvitegravir and cobicistat</b> | J05AR09 | 4 | 232  | 1.72 | 5   | 209   | 2.39 | 5   | 93    | 5.38 | 28862<br>27 | 94547<br>5 | 0.01 | 0.01 |
| <b>Fluoxetine</b>                                                       | N06AB03 | 2 | 875  | 0.23 | 215 | 10164 | 2.12 | 150 | 3450  | 4.35 | 28862<br>27 | 94547<br>5 | 0.36 | 0.35 |
| <b>Colchicine</b>                                                       | M04AC01 | 1 | 779  | 0.13 | 165 | 8144  | 2.03 | 93  | 3728  | 2.49 | 28862<br>27 | 94547<br>5 | 0.39 | 0.28 |
| <b>Agomelatine</b>                                                      | N06AX22 | 2 | 672  | 0.3  | 76  | 3810  | 1.99 | 57  | 1596  | 3.57 | 28862<br>27 | 94547<br>5 | 0.17 | 0.13 |
| <b>Tacrolimus</b>                                                       | D11AH01 | 2 | 458  | 0.44 | 11  | 562   | 1.96 | 10  | 252   | 3.97 | 28862<br>27 | 94547<br>5 | 0.03 | 0.02 |
| <b>Posaconazole</b>                                                     | J02AC04 | 1 | 628  | 0.16 | 90  | 4768  | 1.89 | 38  | 964   | 3.94 | 28862<br>27 | 94547<br>5 | 0.1  | 0.17 |
| <b>Rifampicin</b>                                                       | J04AB02 | 6 | 857  | 0.7  | 131 | 7229  | 1.81 | 102 | 4308  | 2.37 | 28862<br>27 | 94547<br>5 | 0.46 | 0.25 |
| <b>Valproic acid</b>                                                    | N03AG01 | 2 | 1029 | 0.19 | 606 | 33631 | 1.8  | 458 | 10000 | 4.58 | 28862<br>27 | 94547<br>5 | 1.06 | 1.17 |

|                                                       |         |   |      |      |      |            |      |      |            |      |             |            |       |       |
|-------------------------------------------------------|---------|---|------|------|------|------------|------|------|------------|------|-------------|------------|-------|-------|
| <b>Ibuprofen</b>                                      | M01AE01 | 2 | 1437 | 0.14 | 9982 | 56922<br>3 | 1.75 | 7368 | 36530<br>2 | 2.02 | 28862<br>27 | 94547<br>5 | 38.64 | 19.72 |
| <b>Clomipramine</b>                                   | N06AA04 | 3 | 596  | 0.5  | 48   | 2852       | 1.68 | 21   | 824        | 2.55 | 28862<br>27 | 94547<br>5 | 0.09  | 0.1   |
| <b>Drospirenone<br/>and<br/>ethinylestradio<br/>l</b> | G03AA12 | 3 | 419  | 0.72 | 20   | 1220       | 1.64 | 7    | 412        | 1.7  | 28862<br>27 | 94547<br>5 | 0.04  | 0.04  |
| <b>Desogestrel</b>                                    | G03AC09 | 4 | 335  | 1.19 | 7    | 436        | 1.61 | 5    | 201        | 2.49 | 28862<br>27 | 94547<br>5 | 0.02  | 0.02  |
| <b>Medroxyproge<br/>sterone</b>                       | G03DA02 | 4 | 488  | 0.82 | 17   | 1156       | 1.47 | 5    | 374        | 1.34 | 28862<br>27 | 94547<br>5 | 0.04  | 0.04  |
| <b>Ertapenem</b>                                      | J01DH03 | 1 | 697  | 0.14 | 41   | 3009       | 1.36 | 32   | 2076       | 1.54 | 28862<br>27 | 94547<br>5 | 0.22  | 0.1   |
| <b>Estriol</b>                                        | G03CA04 | 3 | 645  | 0.47 | 39   | 3075       | 1.27 | 14   | 1211       | 1.16 | 28862<br>27 | 94547<br>5 | 0.13  | 0.11  |
| <b>Oxcarbazepine</b>                                  | N03AF02 | 4 | 868  | 0.46 | 131  | 10597      | 1.24 | 52   | 2986       | 1.74 | 28862<br>27 | 94547<br>5 | 0.32  | 0.37  |
| <b>Methenamine</b>                                    | J01XX05 | 1 | 620  | 0.16 | 31   | 2563       | 1.21 | 27   | 906        | 2.98 | 28862<br>27 | 94547<br>5 | 0.1   | 0.09  |
| <b>Atazanavir</b>                                     | J05AE08 | 3 | 507  | 0.59 | 22   | 1894       | 1.16 | 12   | 566        | 2.12 | 28862<br>27 | 94547<br>5 | 0.06  | 0.07  |
| <b>Simvastatin</b>                                    | C10AA01 | 8 | 1392 | 0.57 | 5048 | 44254<br>5 | 1.14 | 3887 | 14857<br>9 | 2.62 | 28862<br>27 | 94547<br>5 | 15.71 | 15.33 |
| <b>Estradiol</b>                                      | G03CA03 | 5 | 1058 | 0.47 | 344  | 31379      | 1.1  | 138  | 10795      | 1.28 | 28862<br>27 | 94547<br>5 | 1.14  | 1.09  |
| <b>Diclofenac</b>                                     | M01AB05 | 1 | 1245 | 0.08 | 1917 | 17792<br>8 | 1.08 | 1326 | 12025<br>6 | 1.1  | 28862<br>27 | 94547<br>5 | 12.72 | 6.16  |
| <b>Meropenem</b>                                      | J01DH02 | 1 | 1283 | 0.08 | 575  | 55688      | 1.03 | 439  | 36151      | 1.21 | 28862<br>27 | 94547<br>5 | 3.82  | 1.93  |
| <b>Imipramine</b>                                     | N06AA02 | 3 | 785  | 0.38 | 69   | 6844       | 1.01 | 45   | 2235       | 2.01 | 28862<br>27 | 94547<br>5 | 0.24  | 0.24  |
| <b>Tacrolimus</b>                                     | L04AD02 | 2 | 765  | 0.26 | 90   | 9708       | 0.93 | 68   | 1900       | 3.58 | 28862<br>27 | 94547<br>5 | 0.2   | 0.34  |
| <b>Celecoxib</b>                                      | M01AH01 | 1 | 996  | 0.1  | 661  | 72096      | 0.92 | 571  | 57153      | 1    | 28862<br>27 | 94547<br>5 | 6.04  | 2.5   |

|                      |         |   |      |      |      |            |      |     |            |      |             |            |       |       |
|----------------------|---------|---|------|------|------|------------|------|-----|------------|------|-------------|------------|-------|-------|
| <b>Naproxen</b>      | M01AE02 | 2 | 811  | 0.25 | 165  | 18264      | 0.9  | 110 | 12381      | 0.89 | 28862<br>27 | 94547<br>5 | 1.31  | 0.63  |
| <b>Everolimus</b>    | L04AA18 | 2 | 459  | 0.44 | 15   | 1735       | 0.86 | 12  | 294        | 4.08 | 28862<br>27 | 94547<br>5 | 0.03  | 0.06  |
| <b>Selegiline</b>    | N04BD01 | 2 | 494  | 0.4  | 14   | 1698       | 0.82 | 6   | 544        | 1.1  | 28862<br>27 | 94547<br>5 | 0.06  | 0.06  |
| <b>Venlafaxine</b>   | N06AX16 | 3 | 1082 | 0.28 | 220  | 39070      | 0.56 | 149 | 12541      | 1.19 | 28862<br>27 | 94547<br>5 | 1.33  | 1.35  |
| <b>Verapamil</b>     | C08DA01 | 3 | 1036 | 0.29 | 221  | 41236      | 0.54 | 135 | 13786      | 0.98 | 28862<br>27 | 94547<br>5 | 1.46  | 1.43  |
| <b>Tamoxifen</b>     | L02BA01 | 2 | 620  | 0.32 | 21   | 4280       | 0.49 | 16  | 1974       | 0.81 | 28862<br>27 | 94547<br>5 | 0.21  | 0.15  |
| <b>Phenobarbital</b> | N03AA02 | 9 | 945  | 0.95 | 107  | 24658      | 0.43 | 51  | 10612      | 0.48 | 28862<br>27 | 94547<br>5 | 1.12  | 0.85  |
| <b>Allopurinol</b>   | M04AA01 | 1 | 1181 | 0.08 | 315  | 76643      | 0.41 | 139 | 22843      | 0.61 | 28862<br>27 | 94547<br>5 | 2.42  | 2.66  |
| <b>Quetiapine</b>    | N05AH04 | 1 | 1134 | 0.09 | 297  | 74846      | 0.4  | 234 | 24677      | 0.95 | 28862<br>27 | 94547<br>5 | 2.61  | 2.59  |
| <b>Nortriptyline</b> | N06AA10 | 2 | 1045 | 0.19 | 87   | 21962      | 0.4  | 60  | 7232       | 0.83 | 28862<br>27 | 94547<br>5 | 0.76  | 0.76  |
| <b>Ticagrelor</b>    | B01AC24 | 2 | 984  | 0.2  | 188  | 49328      | 0.38 | 155 | 30626      | 0.51 | 28862<br>27 | 94547<br>5 | 3.24  | 1.71  |
| <b>Mianserin</b>     | N06AX03 | 1 | 930  | 0.11 | 59   | 16501      | 0.36 | 21  | 6006       | 0.35 | 28862<br>27 | 94547<br>5 | 0.64  | 0.57  |
| <b>Probenecid</b>    | M04AB01 | 2 | 551  | 0.36 | 5    | 1435       | 0.35 | 5   | 469        | 1.07 | 28862<br>27 | 94547<br>5 | 0.05  | 0.05  |
| <b>Midazolam</b>     | N05CD08 | 2 | 1137 | 0.18 | 145  | 42109      | 0.34 | 108 | 33001      | 0.33 | 28862<br>27 | 94547<br>5 | 3.49  | 1.46  |
| <b>Metoprolol</b>    | C07AB02 | 1 | 1392 | 0.07 | 1191 | 37978<br>5 | 0.31 | 399 | 12723<br>7 | 0.31 | 28862<br>27 | 94547<br>5 | 13.46 | 13.16 |
| <b>Apixaban</b>      | B01AF02 | 1 | 811  | 0.12 | 49   | 16377      | 0.3  | 24  | 8230       | 0.29 | 28862<br>27 | 94547<br>5 | 0.87  | 0.57  |
| <b>Nifedipine</b>    | C08CA05 | 2 | 920  | 0.22 | 36   | 12454      | 0.29 | 30  | 4457       | 0.67 | 28862<br>27 | 94547<br>5 | 0.47  | 0.43  |



|                                 |         |   |      |      |     |            |      |     |            |      |             |            |       |       |
|---------------------------------|---------|---|------|------|-----|------------|------|-----|------------|------|-------------|------------|-------|-------|
| <b>Ciprofloxacin</b>            | J01MA02 | 2 | 1384 | 0.14 | 393 | 13525<br>6 | 0.29 | 248 | 86572      | 0.29 | 28862<br>27 | 94547<br>5 | 9.16  | 4.69  |
| <b>Letrozole</b>                | L02BG04 | 1 | 761  | 0.13 | 25  | 9502       | 0.26 | 14  | 4067       | 0.34 | 28862<br>27 | 94547<br>5 | 0.43  | 0.33  |
| <b>Sulfamethizole</b>           | J01EB02 | 1 | 943  | 0.11 | 31  | 11944      | 0.26 | 27  | 10010      | 0.27 | 28862<br>27 | 94547<br>5 | 1.06  | 0.41  |
| <b>Dabigatran<br/>etexilate</b> | B01AE07 | 2 | 899  | 0.22 | 81  | 32015      | 0.25 | 43  | 14549      | 0.3  | 28862<br>27 | 94547<br>5 | 1.54  | 1.11  |
| <b>Atorvastatin</b>             | C10AA05 | 1 | 1142 | 0.09 | 231 | 94086      | 0.25 | 64  | 36004      | 0.18 | 28862<br>27 | 94547<br>5 | 3.81  | 3.26  |
| <b>Rosuvastatin</b>             | C10AA07 | 1 | 967  | 0.1  | 54  | 23416      | 0.23 | 10  | 7811       | 0.13 | 28862<br>27 | 94547<br>5 | 0.83  | 0.81  |
| <b>Zuclopenthixol</b>           | N05AF05 | 1 | 823  | 0.12 | 25  | 14838      | 0.17 | 14  | 4039       | 0.35 | 28862<br>27 | 94547<br>5 | 0.43  | 0.51  |
| <b>Cabergoline</b>              | G02CB03 | 1 | 506  | 0.2  | 10  | 5821       | 0.17 | 10  | 4909       | 0.2  | 28862<br>27 | 94547<br>5 | 0.52  | 0.2   |
| <b>Triazolam</b>                | N05CD05 | 3 | 1118 | 0.27 | 43  | 66578      | 0.06 | 33  | 48423      | 0.07 | 28862<br>27 | 94547<br>5 | 5.12  | 2.31  |
| <b>Mirtazapine</b>              | N06AX11 | 1 | 1203 | 0.08 | 28  | 76274      | 0.04 | 13  | 27409      | 0.05 | 28862<br>27 | 94547<br>5 | 2.9   | 2.64  |
| <b>Rivaroxaban</b>              | B01AF01 | 1 | 973  | 0.1  | 9   | 53062      | 0.02 | 5   | 34144      | 0.01 | 28862<br>27 | 94547<br>5 | 3.61  | 1.84  |
| <b>Lansoprazole</b>             | A02BC03 | 1 | 1243 | 0.08 | 15  | 11873<br>7 | 0.01 | 6   | 43814      | 0.01 | 28862<br>27 | 94547<br>5 | 4.63  | 4.11  |
| <b>Pantoprazole</b>             | A02BC02 | 2 | 1518 | 0.13 | 9   | 57044<br>0 | 0    | 5   | 22400<br>2 | 0    | 28862<br>27 | 94547<br>5 | 23.69 | 19.76 |

**Table S3. Overview of drugs involved in discouraged combinations**

Drugs used by less than 5 patients were omitted to avoid privacy issues.

| Drug name   | ATC     | Recommendation level | Clinical significance | Documentation      | pDDIs (N) |
|-------------|---------|----------------------|-----------------------|--------------------|-----------|
| Domperidone | A03FA03 | 5                    | Minor                 | Documented         | 2         |
| Domperidone | A03FA03 | 5                    | None                  | Documented         | 2         |
| Domperidone | A03FA03 | 1                    | Major                 | Limited documented | 1         |
| Warfarin    | B01AA03 | 5                    | Minor                 | Documented         | 3         |
| Warfarin    | B01AA03 | 5                    | Minor                 | Well documented    | 3         |
| Warfarin    | B01AA03 | 5                    | Moderate              | Poorly documented  | 1         |
| Warfarin    | B01AA03 | 5                    | None                  | Documented         | 56        |
| Warfarin    | B01AA03 | 5                    | None                  | Limited documented | 4         |
| Warfarin    | B01AA03 | 5                    | None                  | Well documented    | 4         |
| Warfarin    | B01AA03 | 5                    | Possible              | Documented         | 4         |
| Warfarin    | B01AA03 | 5                    | Undetermined          | Documented         | 4         |
| Warfarin    | B01AA03 | 5                    | Undetermined          | Poorly documented  | 12        |
| Warfarin    | B01AA03 | 5                    | Undetermined          | Well documented    | 2         |
| Warfarin    | B01AA03 | 4                    | Major                 | Well documented    | 5         |
| Warfarin    | B01AA03 | 4                    | Minor                 | Documented         | 1         |
| Warfarin    | B01AA03 | 4                    | Moderate              | Documented         | 6         |
| Warfarin    | B01AA03 | 4                    | Moderate              | Limited documented | 4         |
| Warfarin    | B01AA03 | 4                    | Moderate              | Poorly documented  | 5         |
| Warfarin    | B01AA03 | 4                    | Moderate              | Well documented    | 17        |
| Warfarin    | B01AA03 | 4                    | Possible              | Documented         | 11        |
| Warfarin    | B01AA03 | 4                    | Possible              | Limited documented | 3         |
| Warfarin    | B01AA03 | 4                    | Possible              | Poorly documented  | 5         |
| Warfarin    | B01AA03 | 4                    | Possible              | Well documented    | 1         |
| Warfarin    | B01AA03 | 4                    | Undetermined          | Documented         | 2         |
| Warfarin    | B01AA03 | 4                    | Undetermined          | Poorly documented  | 3         |
| Warfarin    | B01AA03 | 2                    | Major                 | Documented         | 4         |
| Warfarin    | B01AA03 | 2                    | Major                 | Limited documented | 4         |

|                      |         |   |              |                    |    |
|----------------------|---------|---|--------------|--------------------|----|
| <b>Warfarin</b>      | B01AA03 | 2 | Major        | Well documented    | 2  |
| <b>Warfarin</b>      | B01AA03 | 2 | Moderate     | Documented         | 13 |
| <b>Warfarin</b>      | B01AA03 | 2 | Moderate     | Limited documented | 1  |
| <b>Warfarin</b>      | B01AA03 | 2 | Moderate     | Poorly documented  | 3  |
| <b>Warfarin</b>      | B01AA03 | 2 | Moderate     | Well documented    | 6  |
| <b>Warfarin</b>      | B01AA03 | 2 | Possible     | Documented         | 1  |
| <b>Warfarin</b>      | B01AA03 | 2 | Possible     | Poorly documented  | 6  |
| <b>Warfarin</b>      | B01AA03 | 1 | Major        | Documented         | 5  |
| <b>Warfarin</b>      | B01AA03 | 1 | Major        | Poorly documented  | 6  |
| <b>Warfarin</b>      | B01AA03 | 1 | Major        | Well documented    | 4  |
| <b>Warfarin</b>      | B01AA03 | 1 | Possible     | Documented         | 1  |
| <b>Phenprocoumon</b> | B01AA04 | 5 | None         | Documented         | 12 |
| <b>Phenprocoumon</b> | B01AA04 | 5 | None         | Limited documented | 2  |
| <b>Phenprocoumon</b> | B01AA04 | 5 | None         | Poorly documented  | 2  |
| <b>Phenprocoumon</b> | B01AA04 | 5 | None         | Well documented    | 1  |
| <b>Phenprocoumon</b> | B01AA04 | 5 | Undetermined | Limited documented | 2  |
| <b>Phenprocoumon</b> | B01AA04 | 4 | Moderate     | Documented         | 4  |
| <b>Phenprocoumon</b> | B01AA04 | 4 | Moderate     | Poorly documented  | 4  |
| <b>Phenprocoumon</b> | B01AA04 | 4 | Possible     | Documented         | 7  |
| <b>Phenprocoumon</b> | B01AA04 | 4 | Possible     | Limited documented | 2  |
| <b>Phenprocoumon</b> | B01AA04 | 4 | Possible     | Poorly documented  | 2  |
| <b>Phenprocoumon</b> | B01AA04 | 4 | Undetermined | Limited documented | 1  |
| <b>Phenprocoumon</b> | B01AA04 | 4 | Undetermined | Poorly documented  | 1  |
| <b>Phenprocoumon</b> | B01AA04 | 2 | Moderate     | Documented         | 1  |
| <b>Phenprocoumon</b> | B01AA04 | 2 | Moderate     | Poorly documented  | 2  |
| <b>Phenprocoumon</b> | B01AA04 | 2 | Possible     | Poorly documented  | 1  |
| <b>Phenprocoumon</b> | B01AA04 | 2 | Undetermined | Limited documented | 1  |
| <b>Phenprocoumon</b> | B01AA04 | 1 | Major        | Documented         | 1  |
| <b>Phenprocoumon</b> | B01AA04 | 1 | Major        | Well documented    | 1  |
| <b>Ketoconazole</b>  | D01AC08 | 5 | Minor        | Documented         | 3  |
| <b>Ketoconazole</b>  | D01AC08 | 5 | Minor        | Limited documented | 3  |

|                     |         |   |              |                    |    |
|---------------------|---------|---|--------------|--------------------|----|
| <b>Ketoconazole</b> | D01AC08 | 5 | None         | Documented         | 11 |
| <b>Ketoconazole</b> | D01AC08 | 5 | None         | Limited documented | 5  |
| <b>Ketoconazole</b> | D01AC08 | 5 | Possible     | Well documented    | 1  |
| <b>Ketoconazole</b> | D01AC08 | 5 | Undetermined | Documented         | 1  |
| <b>Ketoconazole</b> | D01AC08 | 4 | Major        | Documented         | 2  |
| <b>Ketoconazole</b> | D01AC08 | 4 | Moderate     | Documented         | 5  |
| <b>Ketoconazole</b> | D01AC08 | 4 | Possible     | Documented         | 11 |
| <b>Ketoconazole</b> | D01AC08 | 4 | Possible     | Well documented    | 1  |
| <b>Ketoconazole</b> | D01AC08 | 3 | Major        | Documented         | 1  |
| <b>Ketoconazole</b> | D01AC08 | 3 | Possible     | Poorly documented  | 7  |
| <b>Ketoconazole</b> | D01AC08 | 2 | Major        | Documented         | 3  |
| <b>Ketoconazole</b> | D01AC08 | 2 | Major        | Well documented    | 3  |
| <b>Ketoconazole</b> | D01AC08 | 2 | Minor        | Documented         | 1  |
| <b>Ketoconazole</b> | D01AC08 | 2 | Moderate     | Documented         | 20 |
| <b>Ketoconazole</b> | D01AC08 | 2 | Moderate     | Poorly documented  | 1  |
| <b>Ketoconazole</b> | D01AC08 | 2 | Moderate     | Well documented    | 3  |
| <b>Ketoconazole</b> | D01AC08 | 2 | Possible     | Documented         | 1  |
| <b>Ketoconazole</b> | D01AC08 | 1 | Major        | Documented         | 3  |
| <b>Ketoconazole</b> | D01AC08 | 1 | Major        | Limited documented | 3  |
| <b>Erythromycin</b> | J01FA01 | 5 | Minor        | Documented         | 3  |
| <b>Erythromycin</b> | J01FA01 | 5 | Moderate     | Poorly documented  | 1  |
| <b>Erythromycin</b> | J01FA01 | 5 | None         | Documented         | 7  |
| <b>Erythromycin</b> | J01FA01 | 5 | None         | Limited documented | 1  |
| <b>Erythromycin</b> | J01FA01 | 4 | Major        | Documented         | 2  |
| <b>Erythromycin</b> | J01FA01 | 4 | Major        | Poorly documented  | 2  |
| <b>Erythromycin</b> | J01FA01 | 4 | Major        | Well documented    | 1  |
| <b>Erythromycin</b> | J01FA01 | 4 | Moderate     | Documented         | 2  |
| <b>Erythromycin</b> | J01FA01 | 4 | Possible     | Documented         | 3  |
| <b>Erythromycin</b> | J01FA01 | 4 | Possible     | Limited documented | 2  |
| <b>Erythromycin</b> | J01FA01 | 4 | Possible     | Well documented    | 1  |
| <b>Erythromycin</b> | J01FA01 | 4 | Undetermined | Documented         | 6  |
| <b>Erythromycin</b> | J01FA01 | 4 | Undetermined | Limited documented | 1  |
| <b>Erythromycin</b> | J01FA01 | 4 | Undetermined | Poorly documented  | 1  |

|                       |         |   |              |                    |    |
|-----------------------|---------|---|--------------|--------------------|----|
| <b>Erythromycin</b>   | J01FA01 | 2 | Major        | Documented         | 1  |
| <b>Erythromycin</b>   | J01FA01 | 2 | Major        | Limited documented | 1  |
| <b>Erythromycin</b>   | J01FA01 | 2 | Moderate     | Documented         | 6  |
| <b>Erythromycin</b>   | J01FA01 | 2 | Moderate     | Well documented    | 1  |
| <b>Erythromycin</b>   | J01FA01 | 2 | Possible     | Well documented    | 1  |
| <b>Erythromycin</b>   | J01FA01 | 2 | Undetermined | Limited documented | 1  |
| <b>Erythromycin</b>   | J01FA01 | 1 | Major        | Documented         | 2  |
| <b>Erythromycin</b>   | J01FA01 | 1 | Major        | Limited documented | 3  |
| <b>Erythromycin</b>   | J01FA01 | 1 | Major        | Well documented    | 2  |
| <b>Erythromycin</b>   | J01FA01 | 1 | Possible     | Documented         | 1  |
| <b>Clarithromycin</b> | J01FA09 | 5 | Minor        | Documented         | 4  |
| <b>Clarithromycin</b> | J01FA09 | 5 | Minor        | Limited documented | 1  |
| <b>Clarithromycin</b> | J01FA09 | 5 | Moderate     | Poorly documented  | 1  |
| <b>Clarithromycin</b> | J01FA09 | 5 | None         | Documented         | 4  |
| <b>Clarithromycin</b> | J01FA09 | 5 | None         | Limited documented | 1  |
| <b>Clarithromycin</b> | J01FA09 | 5 | Possible     | Documented         | 1  |
| <b>Clarithromycin</b> | J01FA09 | 5 | Possible     | Limited documented | 1  |
| <b>Clarithromycin</b> | J01FA09 | 5 | Possible     | Poorly documented  | 2  |
| <b>Clarithromycin</b> | J01FA09 | 5 | Undetermined | Limited documented | 1  |
| <b>Clarithromycin</b> | J01FA09 | 5 | Undetermined | Poorly documented  | 2  |
| <b>Clarithromycin</b> | J01FA09 | 4 | Major        | Documented         | 3  |
| <b>Clarithromycin</b> | J01FA09 | 4 | Major        | Poorly documented  | 14 |
| <b>Clarithromycin</b> | J01FA09 | 4 | Moderate     | Documented         | 1  |
| <b>Clarithromycin</b> | J01FA09 | 4 | Moderate     | Limited documented | 2  |
| <b>Clarithromycin</b> | J01FA09 | 4 | Moderate     | Poorly documented  | 1  |
| <b>Clarithromycin</b> | J01FA09 | 4 | Moderate     | Well documented    | 2  |
| <b>Clarithromycin</b> | J01FA09 | 4 | None         | Documented         | 1  |
| <b>Clarithromycin</b> | J01FA09 | 4 | Possible     | Documented         | 7  |
| <b>Clarithromycin</b> | J01FA09 | 4 | Possible     | Limited documented | 2  |
| <b>Clarithromycin</b> | J01FA09 | 4 | Possible     | Well documented    | 2  |
| <b>Clarithromycin</b> | J01FA09 | 4 | Undetermined | Poorly documented  | 2  |

|                       |         |   |              |                    |   |
|-----------------------|---------|---|--------------|--------------------|---|
| <b>Clarithromycin</b> | J01FA09 | 3 | Moderate     | Poorly documented  | 2 |
| <b>Clarithromycin</b> | J01FA09 | 2 | Major        | Well documented    | 1 |
| <b>Clarithromycin</b> | J01FA09 | 2 | Moderate     | Documented         | 6 |
| <b>Clarithromycin</b> | J01FA09 | 2 | Moderate     | Limited documented | 1 |
| <b>Clarithromycin</b> | J01FA09 | 2 | Moderate     | Well documented    | 1 |
| <b>Clarithromycin</b> | J01FA09 | 2 | Possible     | Documented         | 2 |
| <b>Clarithromycin</b> | J01FA09 | 2 | Possible     | Limited documented | 2 |
| <b>Clarithromycin</b> | J01FA09 | 2 | Possible     | Well documented    | 1 |
| <b>Clarithromycin</b> | J01FA09 | 2 | Undetermined | Documented         | 2 |
| <b>Clarithromycin</b> | J01FA09 | 1 | Major        | Documented         | 8 |
| <b>Clarithromycin</b> | J01FA09 | 1 | Major        | Poorly documented  | 4 |
| <b>Clarithromycin</b> | J01FA09 | 1 | Moderate     | Documented         | 2 |
| <b>Ketoconazole</b>   | J02AB02 | 5 | None         | Documented         | 6 |
| <b>Ketoconazole</b>   | J02AB02 | 5 | Undetermined | Documented         | 1 |
| <b>Ketoconazole</b>   | J02AB02 | 4 | Moderate     | Documented         | 2 |
| <b>Ketoconazole</b>   | J02AB02 | 4 | Possible     | Documented         | 1 |
| <b>Ketoconazole</b>   | J02AB02 | 3 | Possible     | Poorly documented  | 4 |
| <b>Ketoconazole</b>   | J02AB02 | 2 | Major        | Documented         | 1 |
| <b>Ketoconazole</b>   | J02AB02 | 2 | Major        | Well documented    | 2 |
| <b>Ketoconazole</b>   | J02AB02 | 2 | Moderate     | Documented         | 5 |
| <b>Ketoconazole</b>   | J02AB02 | 2 | Moderate     | Poorly documented  | 1 |
| <b>Ketoconazole</b>   | J02AB02 | 2 | Moderate     | Well documented    | 3 |
| <b>Ketoconazole</b>   | J02AB02 | 1 | Major        | Documented         | 1 |
| <b>Ketoconazole</b>   | J02AB02 | 1 | Major        | Limited documented | 1 |
| <b>Rifabutin</b>      | J04AB04 | 5 | Minor        | Documented         | 1 |
| <b>Rifabutin</b>      | J04AB04 | 5 | Minor        | Poorly documented  | 1 |
| <b>Rifabutin</b>      | J04AB04 | 5 | None         | Documented         | 3 |
| <b>Rifabutin</b>      | J04AB04 | 4 | Moderate     | Documented         | 1 |
| <b>Rifabutin</b>      | J04AB04 | 4 | Moderate     | Well documented    | 1 |
| <b>Rifabutin</b>      | J04AB04 | 4 | Possible     | Documented         | 1 |
| <b>Rifabutin</b>      | J04AB04 | 2 | Major        | Documented         | 1 |
| <b>Rifabutin</b>      | J04AB04 | 2 | Moderate     | Documented         | 3 |
| <b>Rifabutin</b>      | J04AB04 | 2 | Possible     | Well documented    | 1 |
| <b>Rifabutin</b>      | J04AB04 | 1 | Major        | Documented         | 1 |

|                   |         |   |              |                    |   |
|-------------------|---------|---|--------------|--------------------|---|
| <b>Rifabutin</b>  | J04AB04 | 1 | Moderate     | Documented         | 1 |
| <b>Imatinib</b>   | L01XE01 | 5 | None         | Documented         | 9 |
| <b>Imatinib</b>   | L01XE01 | 5 | Possible     | Poorly documented  | 1 |
| <b>Imatinib</b>   | L01XE01 | 5 | Undetermined | Poorly documented  | 1 |
| <b>Imatinib</b>   | L01XE01 | 4 | Minor        | Documented         | 1 |
| <b>Imatinib</b>   | L01XE01 | 4 | Moderate     | Documented         | 1 |
| <b>Imatinib</b>   | L01XE01 | 4 | Moderate     | Limited documented | 1 |
| <b>Imatinib</b>   | L01XE01 | 4 | Moderate     | Poorly documented  | 2 |
| <b>Imatinib</b>   | L01XE01 | 4 | Possible     | Limited documented | 1 |
| <b>Imatinib</b>   | L01XE01 | 4 | Possible     | Poorly documented  | 1 |
| <b>Imatinib</b>   | L01XE01 | 2 | Moderate     | Documented         | 1 |
| <b>Imatinib</b>   | L01XE01 | 2 | Possible     | Documented         | 2 |
| <b>Imatinib</b>   | L01XE01 | 1 | Major        | Documented         | 1 |
| <b>Sirolimus</b>  | L04AA10 | 5 | None         | Documented         | 2 |
| <b>Sirolimus</b>  | L04AA10 | 4 | Major        | Poorly documented  | 1 |
| <b>Sirolimus</b>  | L04AA10 | 4 | Moderate     | Limited documented | 1 |
| <b>Sirolimus</b>  | L04AA10 | 4 | Moderate     | Poorly documented  | 1 |
| <b>Sirolimus</b>  | L04AA10 | 2 | Major        | Documented         | 1 |
| <b>Sirolimus</b>  | L04AA10 | 2 | Major        | Limited documented | 3 |
| <b>Sirolimus</b>  | L04AA10 | 2 | Moderate     | Limited documented | 1 |
| <b>Sirolimus</b>  | L04AA10 | 2 | Possible     | Well documented    | 1 |
| <b>Sirolimus</b>  | L04AA10 | 2 | Undetermined | Documented         | 1 |
| <b>Sirolimus</b>  | L04AA10 | 1 | Major        | Documented         | 1 |
| <b>Sirolimus</b>  | L04AA10 | 1 | Major        | Limited documented | 1 |
| <b>Sirolimus</b>  | L04AA10 | 1 | Major        | Poorly documented  | 1 |
| <b>Etoricoxib</b> | M01AH05 | 5 | Minor        | Documented         | 2 |
| <b>Etoricoxib</b> | M01AH05 | 5 | None         | Documented         | 3 |
| <b>Etoricoxib</b> | M01AH05 | 4 | Undetermined | Poorly documented  | 1 |
| <b>Etoricoxib</b> | M01AH05 | 2 | Possible     | Documented         | 1 |
| <b>Etoricoxib</b> | M01AH05 | 1 | Major        | Documented         | 1 |
| <b>Tizanidine</b> | M03BX02 | 4 | Moderate     | Limited documented | 3 |
| <b>Tizanidine</b> | M03BX02 | 4 | Possible     | Documented         | 1 |
| <b>Tizanidine</b> | M03BX02 | 4 | Possible     | Poorly documented  | 2 |

|                      |         |   |              |                    |    |
|----------------------|---------|---|--------------|--------------------|----|
| <b>Tizanidine</b>    | M03BX02 | 1 | Major        | Documented         | 3  |
| <b>Paroxetine</b>    | N06AB05 | 5 | None         | Documented         | 10 |
| <b>Paroxetine</b>    | N06AB05 | 5 | Possible     | Poorly documented  | 2  |
| <b>Paroxetine</b>    | N06AB05 | 4 | Major        | Poorly documented  | 2  |
| <b>Paroxetine</b>    | N06AB05 | 4 | Major        | Well documented    | 1  |
| <b>Paroxetine</b>    | N06AB05 | 4 | Minor        | Documented         | 2  |
| <b>Paroxetine</b>    | N06AB05 | 4 | Moderate     | Documented         | 3  |
| <b>Paroxetine</b>    | N06AB05 | 4 | Moderate     | Limited documented | 1  |
| <b>Paroxetine</b>    | N06AB05 | 4 | Moderate     | Poorly documented  | 11 |
| <b>Paroxetine</b>    | N06AB05 | 4 | Moderate     | Well documented    | 2  |
| <b>Paroxetine</b>    | N06AB05 | 4 | Possible     | Documented         | 7  |
| <b>Paroxetine</b>    | N06AB05 | 4 | Possible     | Limited documented | 2  |
| <b>Paroxetine</b>    | N06AB05 | 4 | Possible     | Poorly documented  | 1  |
| <b>Paroxetine</b>    | N06AB05 | 4 | Undetermined | Documented         | 1  |
| <b>Paroxetine</b>    | N06AB05 | 4 | Undetermined | Poorly documented  | 1  |
| <b>Paroxetine</b>    | N06AB05 | 2 | Moderate     | Documented         | 1  |
| <b>Paroxetine</b>    | N06AB05 | 2 | None         | Documented         | 1  |
| <b>Paroxetine</b>    | N06AB05 | 1 | Major        | Documented         | 3  |
| <b>Paroxetine</b>    | N06AB05 | 1 | Moderate     | Well documented    | 1  |
| <b>Isocarboxazid</b> | N06AF01 | 4 | Major        | Limited documented | 2  |
| <b>Isocarboxazid</b> | N06AF01 | 4 | Major        | Poorly documented  | 1  |
| <b>Isocarboxazid</b> | N06AF01 | 4 | Moderate     | Limited documented | 3  |
| <b>Isocarboxazid</b> | N06AF01 | 4 | Moderate     | Poorly documented  | 1  |
| <b>Isocarboxazid</b> | N06AF01 | 4 | Possible     | Poorly documented  | 1  |
| <b>Isocarboxazid</b> | N06AF01 | 1 | Major        | Poorly documented  | 3  |
| <b>Isocarboxazid</b> | N06AF01 | 1 | Undetermined | Poorly documented  | 1  |



**Table S4. List of discouraged drug pairs**

Discouraged drug pairs dispensed in at least 5 admissions ( $\geq 5$  patients) prescribed during patient hospitalisation.

| <b>Drug 1</b>            | <b>Drug 2</b>            | <b>Admissions (N)</b> |
|--------------------------|--------------------------|-----------------------|
| Warfarin (B01AA03)       | Ibuprofen (M01AE01)      | 5,960                 |
| Simvastatin (C10AA01)    | Clarithromycin (J01FA09) | 2,354                 |
| Domperidone (A03FA03)    | Fluconazole (J02AC01)    | 1,664                 |
| Erythromycin (J01FA01)   | Fluconazole (J02AC01)    | 917                   |
| Warfarin (B01AA03)       | Diclofenac (M01AB05)     | 815                   |
| Simvastatin (C10AA01)    | Erythromycin (J01FA01)   | 525                   |
| Meropenem (J01DH02)      | Valproic acid (N03AG01)  | 444                   |
| Warfarin (B01AA03)       | Celecoxib (M01AH01)      | 327                   |
| Ciprofloxacin (J01MA02)  | Tizanidine (M03BX02)     | 204                   |
| Clarithromycin (J01FA09) | Quetiapine (N05AH04)     | 194                   |
| Metoprolol (C07AB02)     | Paroxetine (N06AB05)     | 175                   |
| Simvastatin (C10AA01)    | Ketoconazole (D01AC08)   | 173                   |
| Clonidine (N02CX02)      | Amitriptyline (N06AA09)  | 163                   |
| Warfarin (B01AA03)       | Etodolac (M01AB08)       | 119                   |
| Ticagrelor (B01AC24)     | Clarithromycin (J01FA09) | 93                    |
| Terbinafine (D01AE15)    | Amitriptyline (N06AA09)  | 84                    |
| Fluoxetine (N06AB03)     | Venlafaxine (N06AX16)    | 81                    |
| Phenprocoumon (B01AA04)  | Ibuprofen (M01AE01)      | 76                    |
| Carbamazepine (N03AF01)  | Midazolam (N05CD08)      | 74                    |
| Pravastatin (C10AA03)    | Ciclosporin (L04AD01)    | 72                    |
| Verapamil (C08DA01)      | Colchicine (M04AC01)     | 70                    |
| Warfarin (B01AA03)       | Naproxen (M01AE02)       | 64                    |
| Azathioprine (L04AX01)   | Allopurinol (M04AA01)    | 58                    |
| Ciprofloxacin (J01MA02)  | Agomelatine (N06AX22)    | 45                    |
| Terbinafine (D01AE15)    | Nortriptyline (N06AA10)  | 43                    |
| Simvastatin (C10AA01)    | Posaconazole (J02AC04)   | 42                    |
| Atorvastatin (C10AA05)   | Ciclosporin (L04AD01)    | 39                    |
| Erythromycin (J01FA01)   | Tacrolimus (L04AD02)     | 38                    |
| Verapamil (C08DA01)      | Rifampicin (J04AB02)     | 29                    |
| Clarithromycin (J01FA09) | Tacrolimus (L04AD02)     | 27                    |
| Estradiol (G03CA03)      | Carbamazepine (N03AF01)  | 26                    |
| Nifedipine (C08CA05)     | Rifampicin (J04AB02)     | 24                    |
| Voriconazole (J02AC03)   | Rifampicin (J04AB02)     | 22                    |
| Ketoconazole (D01AC08)   | Clarithromycin (J01FA09) | 21                    |

|                                |                                    |    |
|--------------------------------|------------------------------------|----|
| Ertapenem (J01DH03)            | Valproic acid (N03AG01)            | 20 |
| Sulfamethizole (J01EB02)       | Methenamine (J01XX05)              | 19 |
| Ritonavir (J05AE03)            | Triazolam (N05CD05)                | 19 |
| Simvastatin (C10AA01)          | Imatinib (L01XE01)                 | 19 |
| Simvastatin (C10AA01)          | Itraconazole (J02AC02)             | 18 |
| Voriconazole (J02AC03)         | Sirolimus (L04AA10)                | 18 |
| Dabigatran etexilate (B01AE07) | Dronedarone (C01BD07)              | 17 |
| Estradiol (G03CA03)            | Phenobarbital (N03AA02)            | 16 |
| Clonidine (N02CX02)            | Imipramine (N06AA02)               | 15 |
| Apixaban (B01AF02)             | Ketoconazole (D01AC08)             | 15 |
| Isocarboxazid (N06AF01)        | Mianserin (N06AX03)                | 14 |
| Terbinafine (D01AE15)          | Imipramine (N06AA02)               | 14 |
| Estradiol (G03CA03)            | Oxcarbazepine (N03AF02)            | 12 |
| Warfarin (B01AA03)             | Diclofenac, combinations (M01AB55) | 12 |
| Warfarin (B01AA03)             | Piroxicam (M02AA07)                | 11 |
| Warfarin (B01AA03)             | Diclofenac (M02AA15)               | 11 |
| Terbinafine (D01BA02)          | Amitriptyline (N06AA09)            | 10 |
| Warfarin (B01AA03)             | Nabumetone (M01AX01)               | 10 |
| Clarithromycin (J01FA09)       | Everolimus (L04AA18)               | 9  |
| Letrozole (L02BG04)            | Zuclopenthixol (N05AF05)           | 8  |
| Warfarin (B01AA03)             | Diclofenac (S01BC03)               | 8  |
| Terbinafine (D01BA02)          | Nortriptyline (N06AA10)            | 7  |
| Rifabutin (J04AB04)            | Ritonavir (J05AE03)                | 7  |
| Isocarboxazid (N06AF01)        | Mirtazapine (N06AX11)              | 7  |
| Clonidine (N02CX02)            | Clomipramine (N06AA04)             | 7  |
| Ticagrelor (B01AC24)           | Ciclosporin (L04AD01)              | 7  |
| Rifampicin (J04AB02)           | Atazanavir (J05AE08)               | 5  |
| Cabergoline (G02CB03)          | Clarithromycin (J01FA09)           | 5  |
| Dabigatran etexilate (B01AE07) | Ketoconazole (D01AC08)             | 5  |
| Tacrolimus (D11AH01)           | Clarithromycin (J01FA09)           | 5  |
| Lansoprazole (A02BC03)         | Atazanavir (J05AE08)               | 5  |

**Table S5. Effect-size estimates of exposure to discouraged drug pairs on post-discharge mortality, readmission and length-of-stay**

Provides numerical estimate illustrated in Figure 3: estimate (95 confidence interval). Mortality and readmission estimates are hazard ratios. Values below 1 are shown with 2 significant digits, otherwise with 1 significant digit.

| Clinical significance | Drug pair                    | Mortality        | Readmission       | LOS                    |
|-----------------------|------------------------------|------------------|-------------------|------------------------|
| <b>Moderate</b>       | Estradiol<br>+               | -                | 0.74 (0.16; 3.4)  | 0.21 (-0.088; 0.51)    |
|                       | Phenobarbital                |                  |                   |                        |
| <b>Moderate</b>       | Carbamazepine<br>+           | 0.45 (0.1; 2)    | 0.97 (0.47; 2)    | 0.2 (0.0049; 0.39)     |
|                       | Estradiol                    |                  |                   |                        |
| <b>Moderate</b>       | Estradiol<br>+ Oxcarbazepine | 0.78 (0.21; 2.9) | 2.2 (0.81; 6)     | -0.036 (-0.23; 0.15)   |
|                       | Naproxen<br>+                |                  |                   |                        |
| <b>Major</b>          | Warfarin                     | 1.3 (0.61; 2.7)  | 0.92 (0.56; 1.5)  | -0.14 (-0.24; -0.032)  |
|                       | Apixaban<br>+                |                  |                   |                        |
| <b>Major</b>          | Ketoconazole                 | 2.5 (0.81; 7.7)  | 1.6 (0.82; 3.2)   | -0.022 (-0.18; 0.14)   |
|                       | Erythromycin<br>+            |                  |                   |                        |
| <b>Major</b>          | Fluconazole                  | 0.99 (0.73; 1.3) | 0.72 (0.58; 0.89) | -0.089 (-0.12; -0.056) |
|                       | Imatinib<br>+                |                  |                   |                        |
| <b>Major</b>          | Simvastatin                  | 1.1 (0.4; 3.2)   | 1.5 (0.66; 3.6)   | -0.12 (-0.38; 0.13)    |
|                       | Atorvastatin<br>+            |                  |                   |                        |
| <b>Major</b>          | Ciclosporin                  | 0.73 (0.24; 2.3) | 1.7 (0.78; 3.6)   | 0.77 (0.64; 0.9)       |
|                       | Carbamazepine<br>+           |                  |                   |                        |
| <b>Major</b>          | Midazolam                    | 1.5 (0.77; 2.9)  | 0.7 (0.44; 1.1)   | -0.004 (-0.083; 0.075) |
|                       | Celecoxib<br>+               |                  |                   |                        |
| <b>Possible</b>       | Warfarin                     | 0.78 (0.45; 1.4) | 1.2 (0.85; 1.7)   | 0.036 (-0.04; 0.11)    |
|                       | Isocarboxazid<br>+           |                  |                   |                        |
| <b>Un-determined</b>  | Mianserin                    | -                | 0.78 (0.15; 3.9)  | 0.26 (-0.18; 0.7)      |
|                       | Diclofenac<br>(topical)<br>+ |                  |                   |                        |
| <b>Major</b>          | Warfarin                     | 0.96 (0.26; 3.5) | 1.7 (0.66; 4.6)   | 0.8 (0.64; 0.97)       |
|                       | Posaconazole<br>+            |                  |                   |                        |
| <b>Major</b>          | Simvastatin                  | 7.9 (0.71; 88)   | 1.3 (0.27; 6.7)   | 1.1 (0.91; 1.3)        |
|                       | Ciclosporin<br>+             |                  |                   |                        |
| <b>Major</b>          | Ticagrelor                   | -                | 4.2 (0.58; 29.9)  | 0.31 (-0.053; 0.66)    |
|                       | Clarithromycin<br>+          |                  |                   |                        |
| <b>Major</b>          | Tacrolimus<br>(immunosupp.)  | 2.3 (0.64; 8.4)  | 3.4 (1.1; 10.4)   | 0.12 (-0.098; 0.34)    |

|                 |                                                 |                   |                   |                          |
|-----------------|-------------------------------------------------|-------------------|-------------------|--------------------------|
| <b>Major</b>    | Paroxetine<br>+<br>Tamoxifen                    | 1.4 (0.27; 7.3)   | 1.9 (0.33; 10.4)  | 1.1 (0.78; 1.4)          |
| <b>Moderate</b> | Itraconazole<br>+<br>Simvastatin                | 2.4 (0.75; 7.9)   | 2.5 (0.92; 6.6)   | 1.1 (0.93; 1.2)          |
| <b>Major</b>    | Diclofenac,<br>combinations<br>+<br>Warfarin    | 1.5 (0.39; 5.9)   | 1.6 (0.61; 4.3)   | -0.1 (-0.38; 0.17)       |
| <b>Major</b>    | Clonidine<br>+<br>Imipramine                    | 0.87 (0.095; 7.9) | 0.83 (0.31; 2.3)  | 0.38 (0.21; 0.54)        |
| <b>Moderate</b> | Meropenem<br>+<br>Valproic acid                 | 1.5 (1.1; 1.9)    | 0.92 (0.76; 1.1)  | 0.22 (0.19; 0.26)        |
| <b>Major</b>    | Nifedipine<br>+<br>Rifampicin                   | 1.1 (0.13; 10.2)  | 1.2 (0.45; 3)     | 0.1 (-0.11; 0.31)        |
| <b>Moderate</b> | Colchicine<br>+<br>Verapamil                    | 0.61 (0.29; 1.3)  | 1 (0.63; 1.7)     | 0.13 (0.032; 0.23)       |
| <b>Major</b>    | Ketoconazole<br>+<br>Simvastatin                | 1 (0.68; 1.6)     | 1.3 (0.91; 1.8)   | 1.1 (1.1; 1.1)           |
| <b>Moderate</b> | Fluoxetine<br>+<br>Venlafaxine                  | -                 | 1.3 (0.4; 4.2)    | -0.38 (-0.7; -<br>0.063) |
| <b>Major</b>    | Etoricoxib<br>+<br>Warfarin                     | 2.8 (0.17; 47.1)  | 0.82 (0.17; 3.8)  | -0.77 (-1.2; -0.36)      |
| <b>Major</b>    | Amitriptyline<br>+<br>Terbinafine<br>(systemic) | 2.1 (0.53; 8)     | 3.1 (1.1; 8.8)    | -0.39 (-0.63; -<br>0.15) |
| <b>Major</b>    | Imipramine<br>+<br>Terbinafine                  | 3.8 (1.2; 12)     | 1 (0.42; 2.4)     | 0.46 (0.29; 0.62)        |
| <b>Major</b>    | Clarithromycin<br>+<br>Everolimus               | 0.97 (0.1; 9)     | 12.3 (1.1; 138.7) | -1.2 (-1.9; -0.44)       |
| <b>Major</b>    | Ibuprofen<br>+<br>Phenprocoumon                 | 0.81 (0.48; 1.4)  | 1.2 (0.86; 1.7)   | 0.2 (0.12; 0.27)         |
| <b>Major</b>    | Clarithromycin<br>+<br>Quetiapine               | 1.7 (1.1; 2.7)    | 0.94 (0.66; 1.3)  | 1.6 (1.5; 1.6)           |
| <b>Major</b>    | Ritonavir<br>+<br>Triazolam                     | 3.6 (0.49; 26.1)  | 2.6 (0.84; 8.1)   | -0.26 (-0.53;<br>0.0016) |
| <b>Major</b>    | Rifampicin<br>+<br>Voriconazole                 | 0.65 (0.077; 5.4) | 1.3 (0.39; 4.2)   | 0.067 (-0.13; 0.26)      |
| <b>Major</b>    | Piroxicam<br>+<br>Warfarin                      | 3.4 (1; 11.4)     | 1.4 (0.53; 3.9)   | 0.034 (-0.19; 0.25)      |

|                 |                                         |                   |                  |                       |
|-----------------|-----------------------------------------|-------------------|------------------|-----------------------|
| <b>Major</b>    | Diclofenac (systemic) + Warfarin        | 0.83 (0.69; 1)    | 1.1 (0.96; 1.2)  | 0.25 (0.23; 0.28)     |
| <b>Major</b>    | Ertapenem + Valproic acid               | 1.3 (0.54; 3.1)   | 2.6 (1.1; 5.8)   | 0.24 (0.11; 0.38)     |
| <b>Major</b>    | Dabigatran etexilate + Ketoconazole     | -                 | 0.68 (0.14; 3.2) | 0.06 (-0.26; 0.38)    |
| <b>Major</b>    | Diclofenac (ophthalmologica) + Warfarin | 0.83 (0.23; 3)    | 1.7 (0.72; 4)    | 0.45 (0.27; 0.62)     |
| <b>Major</b>    | Clarithromycin + Ticagrelor             | 0.98 (0.51; 1.9)  | 1.7 (1.1; 2.5)   | -0.25 (-0.34; -0.16)  |
| <b>Major</b>    | Clarithromycin + Ketoconazole           | 1.2 (0.24; 5.8)   | 0.56 (0.19; 1.7) | 0.096 (-0.12; 0.31)   |
| <b>Moderate</b> | Estriol + Phenobarbital                 | -                 | 0.45 (0.052; 4)  | -0.13 (-0.63; 0.38)   |
| <b>Major</b>    | Sirolimus + Voriconazole                | 0.51 (0.056; 4.6) | 2.7 (0.45; 16.5) | -0.21 (-0.74; 0.32)   |
| <b>Major</b>    | Ciprofloxacin + Tizanidine              | 1.4 (0.92; 2.1)   | 1.4 (0.99; 1.9)  | 0.36 (0.29; 0.42)     |
| <b>Major</b>    | Ciclosporin + Pravastatin               | 0.22 (0.027; 1.7) | 0.86 (0.22; 3.3) | -0.42 (-0.77; -0.073) |
| <b>Major</b>    | Allopurinol + Azathioprine              | 0.93 (0.39; 2.2)  | 0.87 (0.49; 1.6) | 0.092 (-0.036; 0.22)  |
| <b>Major</b>    | Rifabutin + Ritonavir                   | -                 | -                | 0.51 (0.091; 0.93)    |
| <b>Major</b>    | Nabumetone + Warfarin                   | 0.99 (0.2; 4.8)   | 0.67 (0.18; 2.4) | -0.69 (-0.98; -0.39)  |
| <b>Major</b>    | Domperidone + Fluconazole               | 2.5 (2.1; 3.1)    | 1 (0.89; 1.2)    | 0.29 (0.27; 0.32)     |
| <b>Major</b>    | Methenamine + Sulfamethizole            | 1.7 (0.64; 4.6)   | 1.4 (0.67; 2.8)  | 0.81 (0.7; 0.92)      |
| <b>Major</b>    | Erythromycin + Tacrolimus               | 0.55 (0.066; 4.5) | 0.81 (0.22; 3)   | 0.42 (0.17; 0.67)     |
| <b>Major</b>    | Rifampicin + Verapamil                  | 0.7 (0.28; 1.8)   | 1.4 (0.67; 2.7)  | 0.36 (0.24; 0.47)     |
| <b>Moderate</b> | Metoprolol + Paroxetine                 | 1.1 (0.72; 1.7)   | 0.92 (0.67; 1.3) | 0.088 (0.026; 0.15)   |

|                 |                                                 |                   |                   |                           |
|-----------------|-------------------------------------------------|-------------------|-------------------|---------------------------|
| <b>Major</b>    | Amitriptyline<br>+<br>Clonidine                 | 1.1 (0.62; 1.8)   | 1.1 (0.77; 1.6)   | -0.16 (-0.23; -<br>0.085) |
| <b>Major</b>    | Ibuprofen<br>+<br>Warfarin                      | 0.9 (0.83; 0.98)  | 1.1 (1; 1.2)      | 0.006 (-0.0062;<br>0.018) |
| <b>Major</b>    | Amitriptyline<br>+<br>Terbinafine<br>(topical)  | 1.1 (0.66; 1.9)   | 1 (0.73; 1.5)     | 0.54 (0.48; 0.6)          |
| <b>Major</b>    | Clarithromycin<br>+<br>Simvastatin              | 1.1 (0.95; 1.2)   | 1 (0.92; 1.1)     | 0.082 (0.063; 0.1)        |
| <b>Major</b>    | Agomelatine<br>+<br>Ciprofloxacin               | 2.6 (1.3; 5.5)    | 1.1 (0.62; 1.9)   | 0.82 (0.73; 0.9)          |
| <b>Major</b>    | Nortriptyline<br>+<br>Terbinafine<br>(systemic) | 4.3 (0.86; 21.8)  | 1.7 (0.43; 6.6)   | -0.29 (-0.61;<br>0.032)   |
| <b>Major</b>    | Nortriptyline<br>+<br>Terbinafine<br>(topical)  | 1.1 (0.46; 2.6)   | 1.1 (0.65; 2)     | 0.67 (0.58; 0.77)         |
| <b>Major</b>    | Etodolac<br>+<br>Warfarin                       | 0.76 (0.43; 1.3)  | 1.1 (0.78; 1.6)   | -0.15 (-0.23; -<br>0.07)  |
| <b>Possible</b> | Erythromycin<br>+<br>Simvastatin                | 1.1 (0.83; 1.3)   | 1.1 (0.93; 1.4)   | 0.067 (0.033; 0.1)        |
| <b>Major</b>    | Clarithromycin<br>+<br>Tacrolimus<br>(topical)  | -                 | 0.51 (0.062; 4.2) | -0.087 (-0.54;<br>0.37)   |
| <b>Major</b>    | Clomipramine<br>+<br>Clonidine                  | 0.55 (0.065; 4.6) | 1.4 (0.43; 4.8)   | -0.22 (-0.47;<br>0.029)   |

**Figure S1. Concomitant drug exposure**

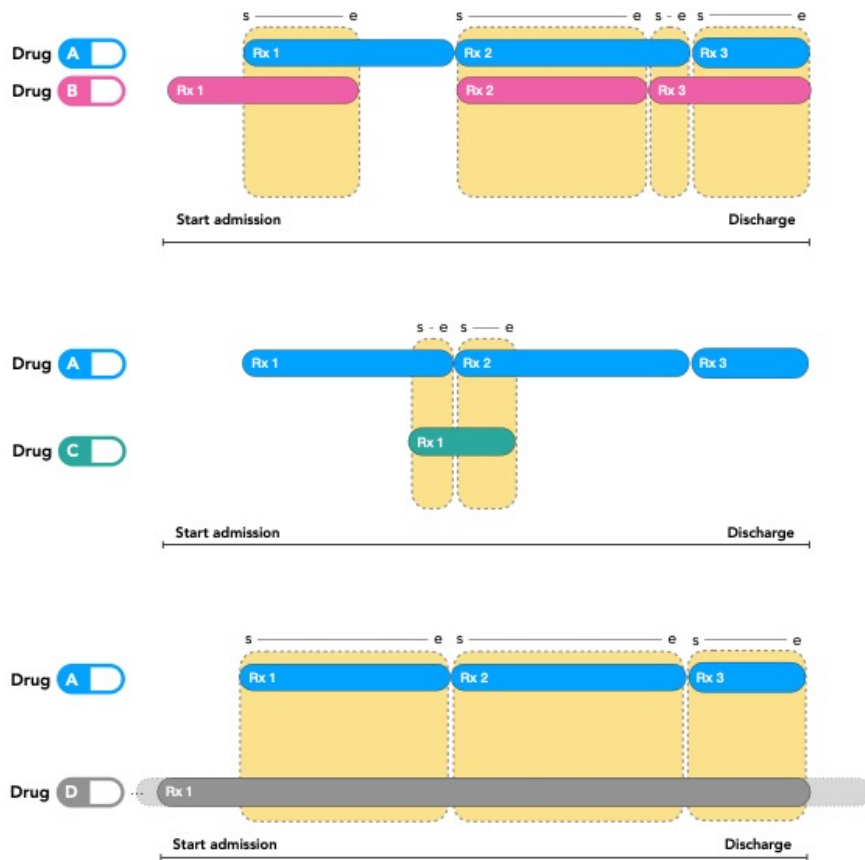

Concomitant drug exposures were defined as two temporally overlapping active drug prescriptions, during admission. The start (s) and the end (e) of the overlaps were defined at the first and last overlapping timestamps for each pair of prescriptions, respectively. Three examples are represented in the top, middle and bottom where yellow boxes represent overlaps. Only active drug prescriptions that were dispensed/administered at the hospital were considered. Adapted from supplementary figure 10 in Leal et al [16].

**Figure S2. Pipeline workflow**

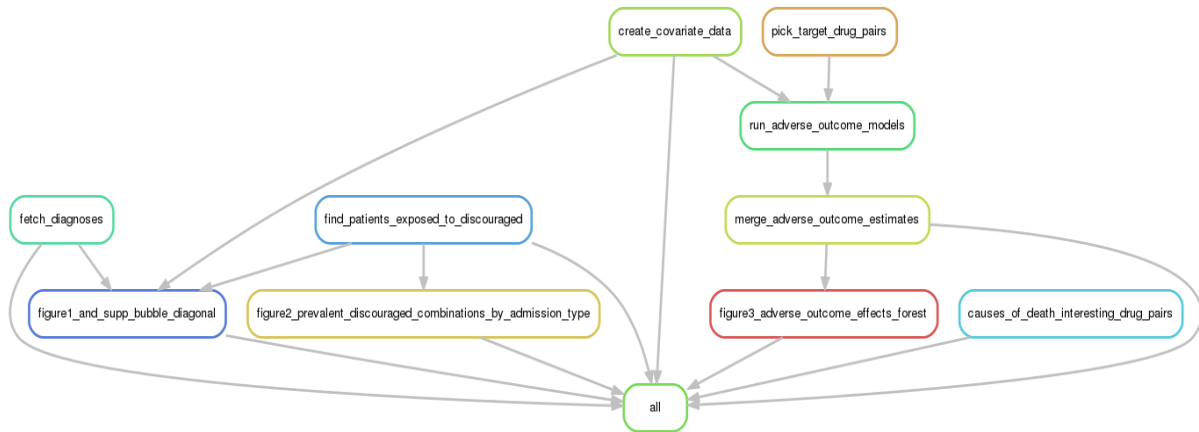

Snakemake pipeline depicting the workflow used for the adverse outcomes analytic part of the study. Schematic overview of the analytic pipeline. Each box represents a distinct step, and arrows represent dependencies between tasks. Preprocessing not depicted.

**Figure S3. Attrition diagram**

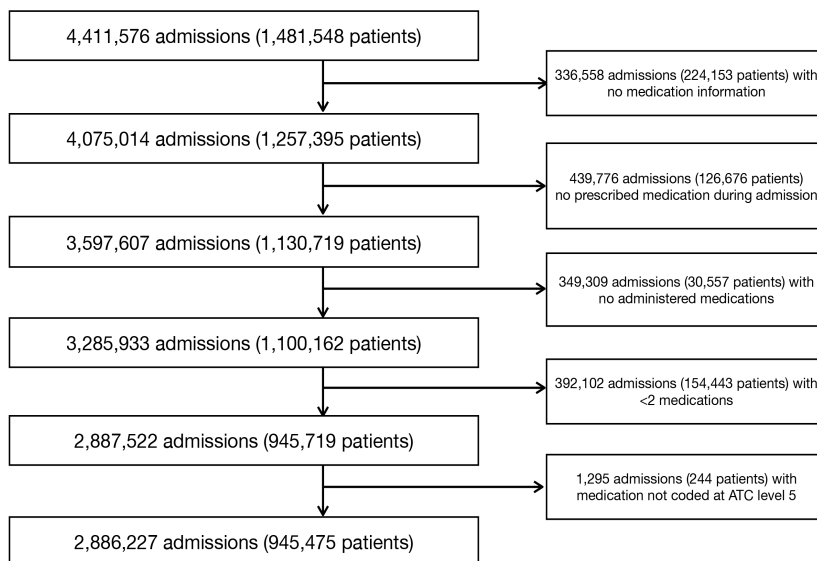



**Figure S4. Drugs prevalently involved in discouraged drug pairs**

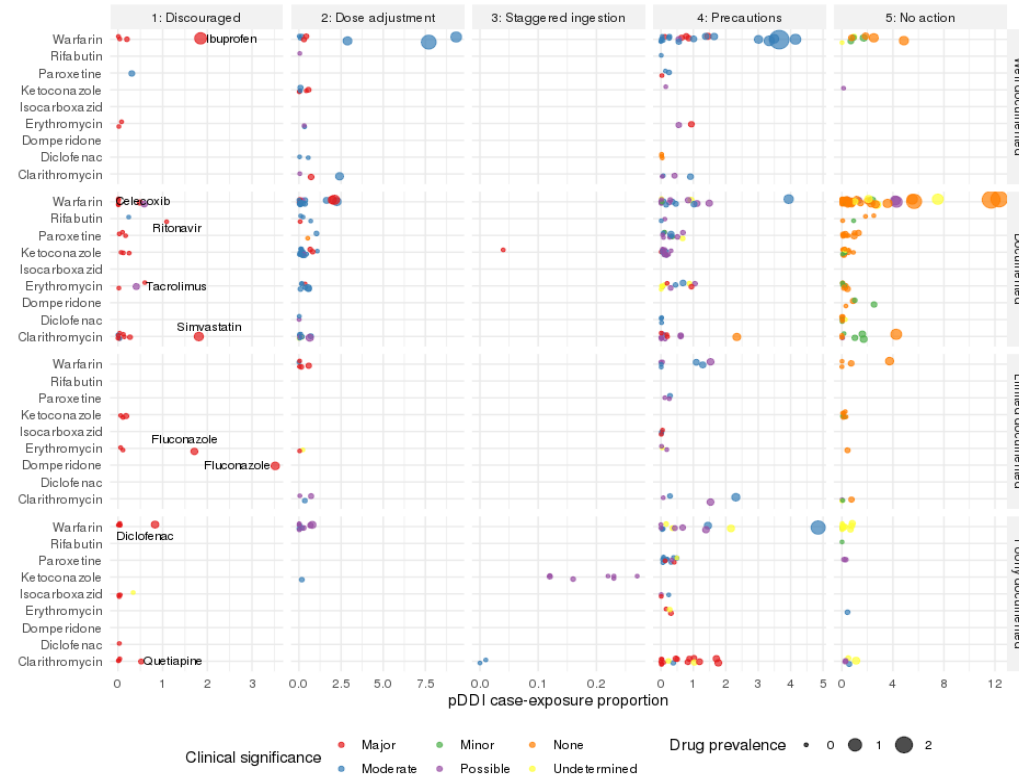

Drugs prevalently involved in discouraged drug pairs by management recommendation (columns) and clinical significance (rows), defined as drugs involved in discouraged drug pairs occurring in at least 10 of admissions. Points represent pDDIs, size the drug prevalence, and colour the clinical significance.

**Figure S5. Standardised differences in proportions of diagnoses in admissions with and without discouraged drug pairs by patient type**

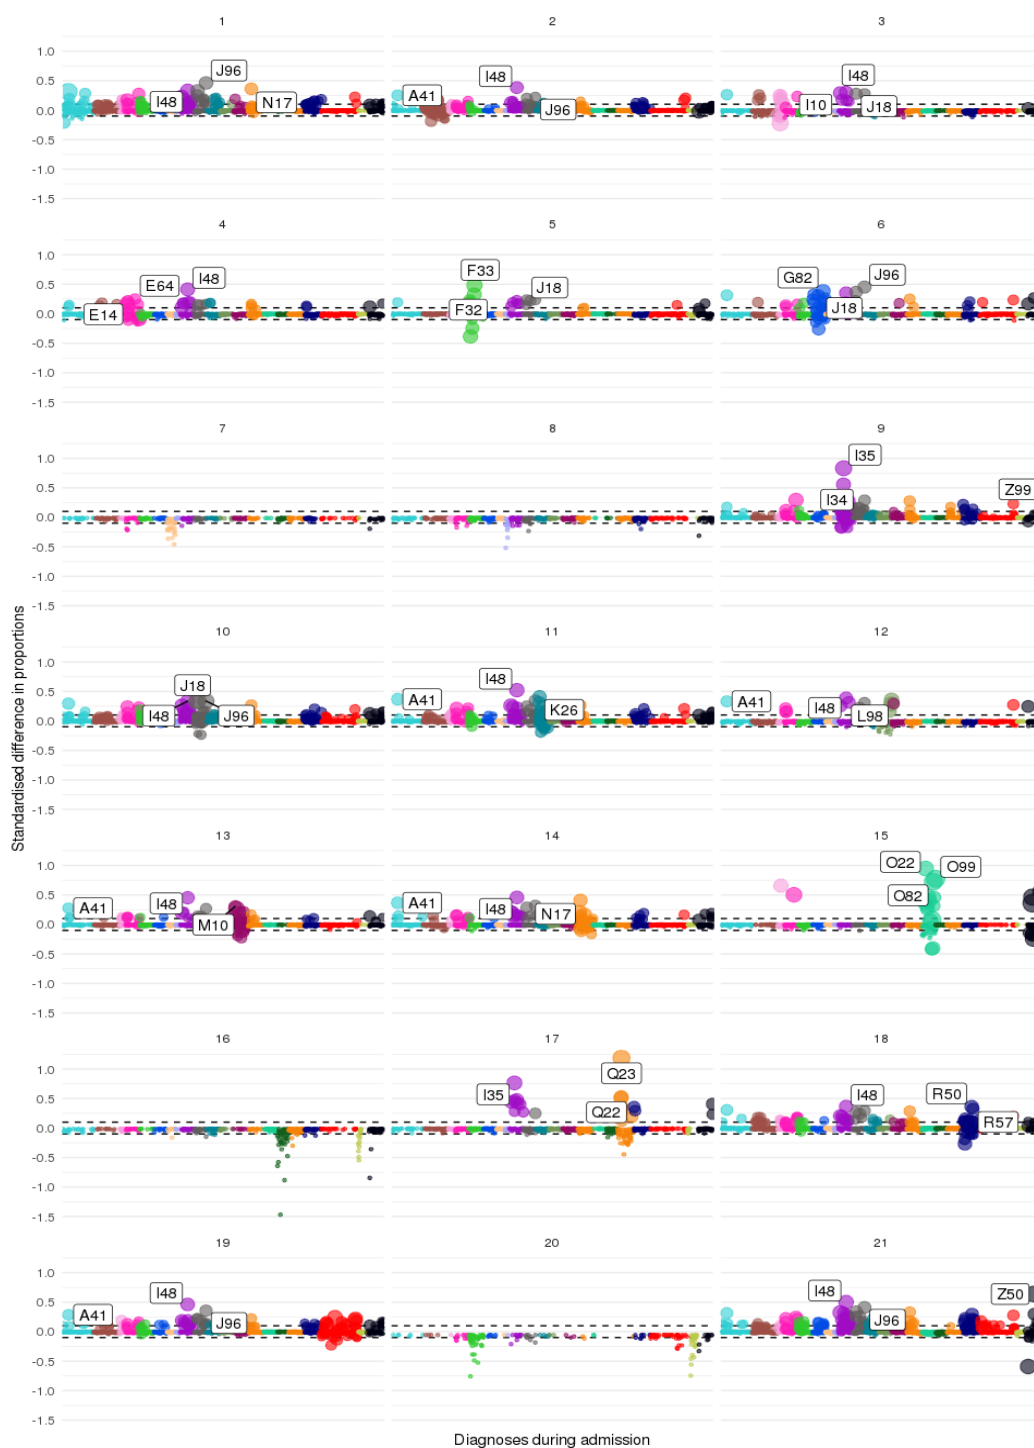

Standardised differences in proportions (i.e. discouraged drug pairs initiated versus not) of diagnoses and during admissions. The colour represents ICD-10 chapter, and the size is the prevalence in patients exposed to discouraged drug pairs. The top three diagnoses and drugs are labelled.

**Figure S6. Phenotyping of diagnoses and medications**

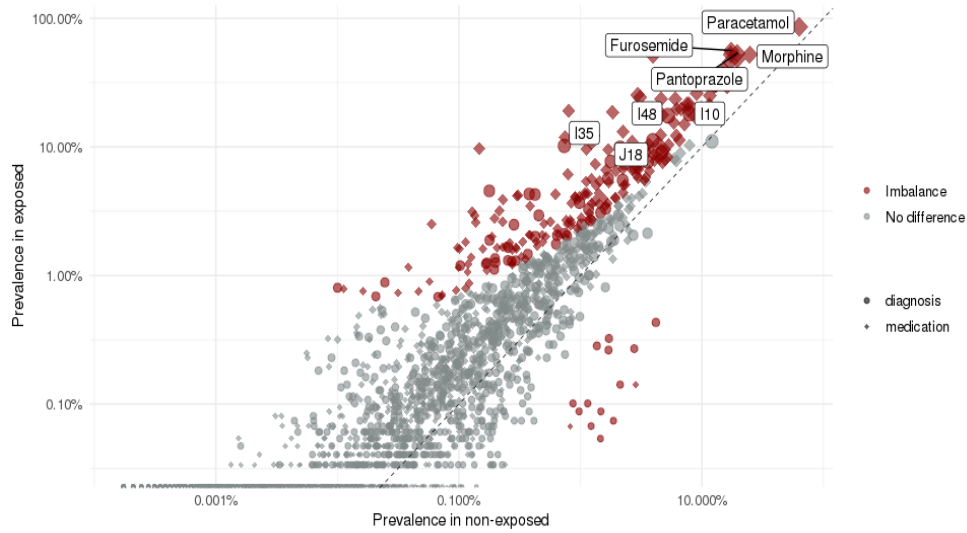

Detailed diagnoses and medication phenotyping of patients exposed to discouraged drug pairs vs. those not exposed. The plot compares the diagnoses and medications during hospitalisation. Each dot represents one of these covariates with the colour indicating the absolute value of the standardized difference in proportion (SPD). The top three medications and diagnoses with SPD > 0.1 (exposed; red) are highlighted.

**Figure S7. Phenotyping of diagnoses and medications by patient type**

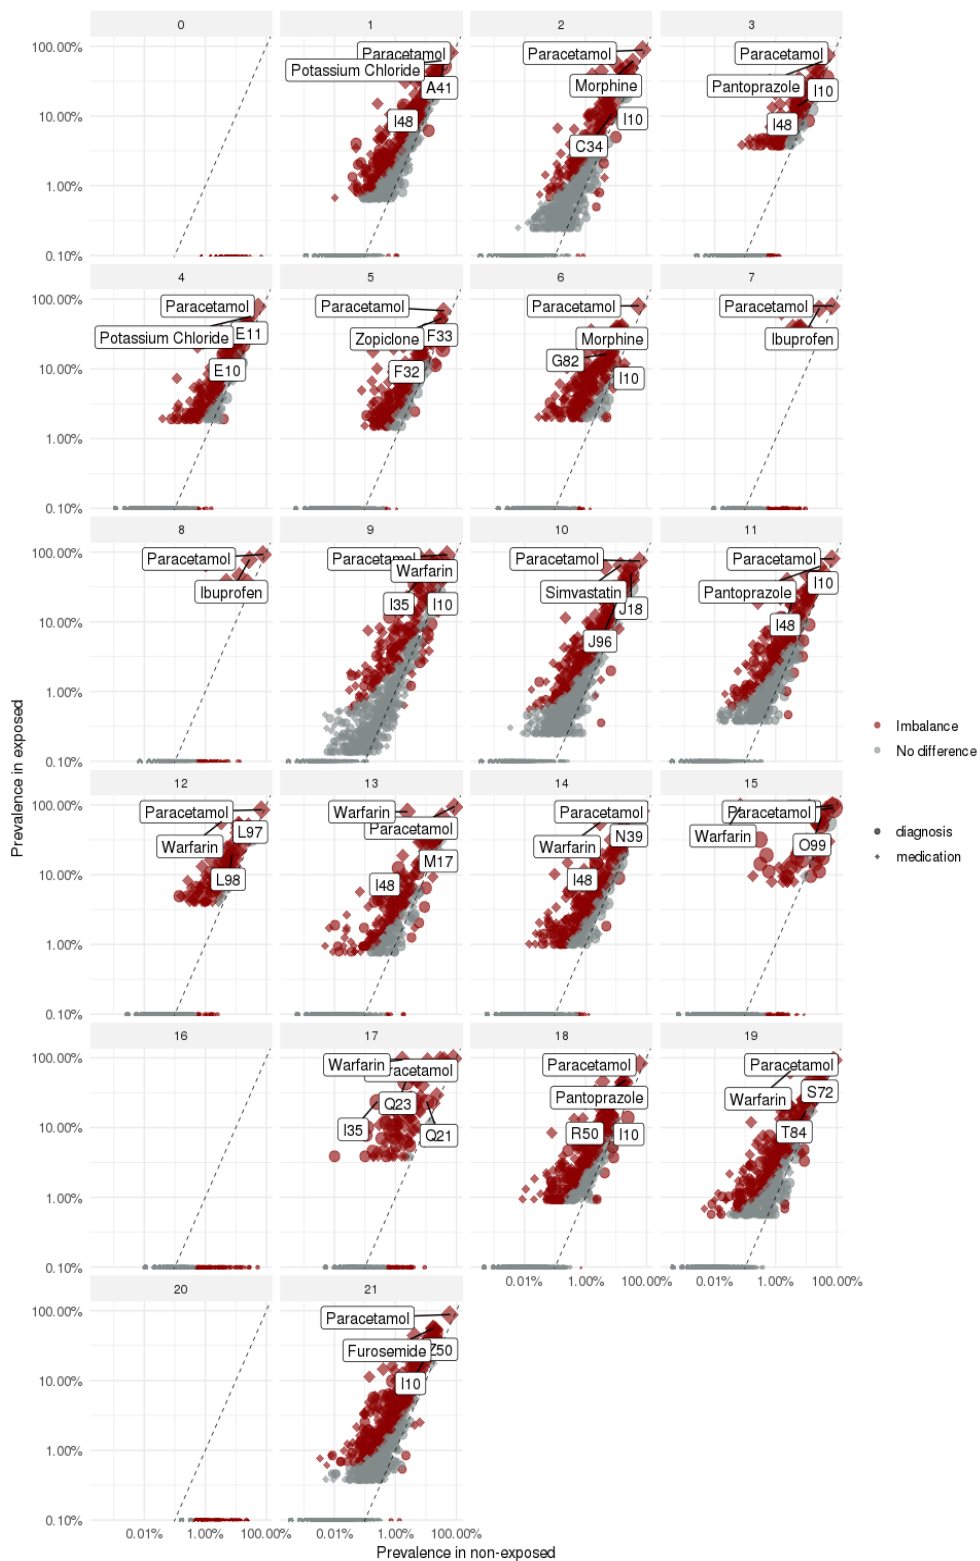

Same as eFigure 5 but by patient type.

**Figure S8. Causes of death at ICD-10 chapter level among deceased exposed to selected drug pairs**

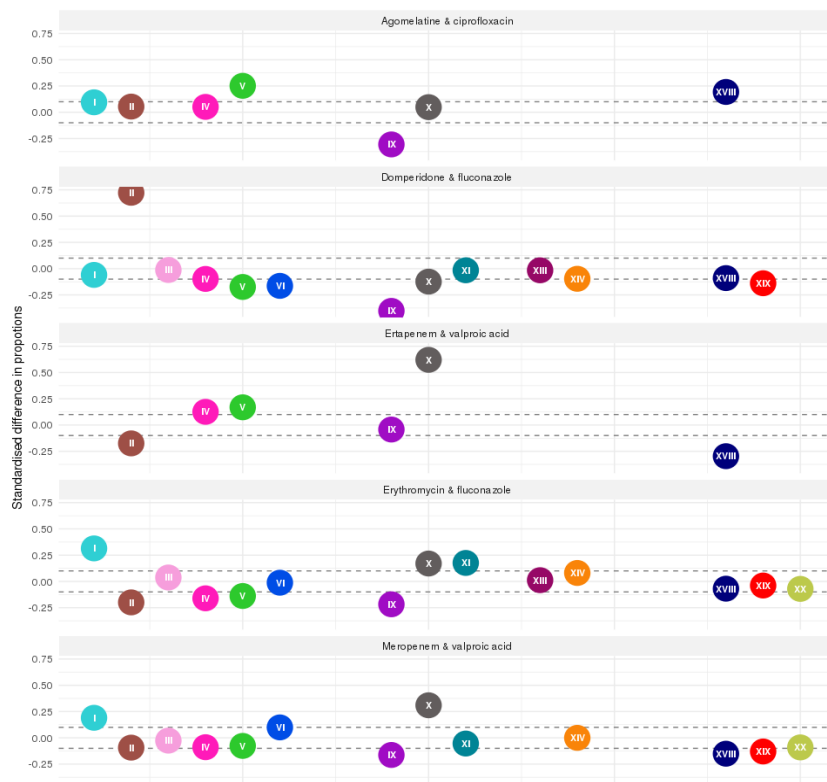

Supplement: PDS-31-632-s001.pdf [file PDS-31-632-s001.pdf]
